# Supplementary material for: Complete genome sequence and identification of polyunsaturated fatty acid biosynthesis genes of the myxobacterium Minicystis rosea DSM 24000T
Source: PubMed Central journal article supplement (PMC8436480; doi:10.1186/s12864-021-07955-x), 2021-09-13

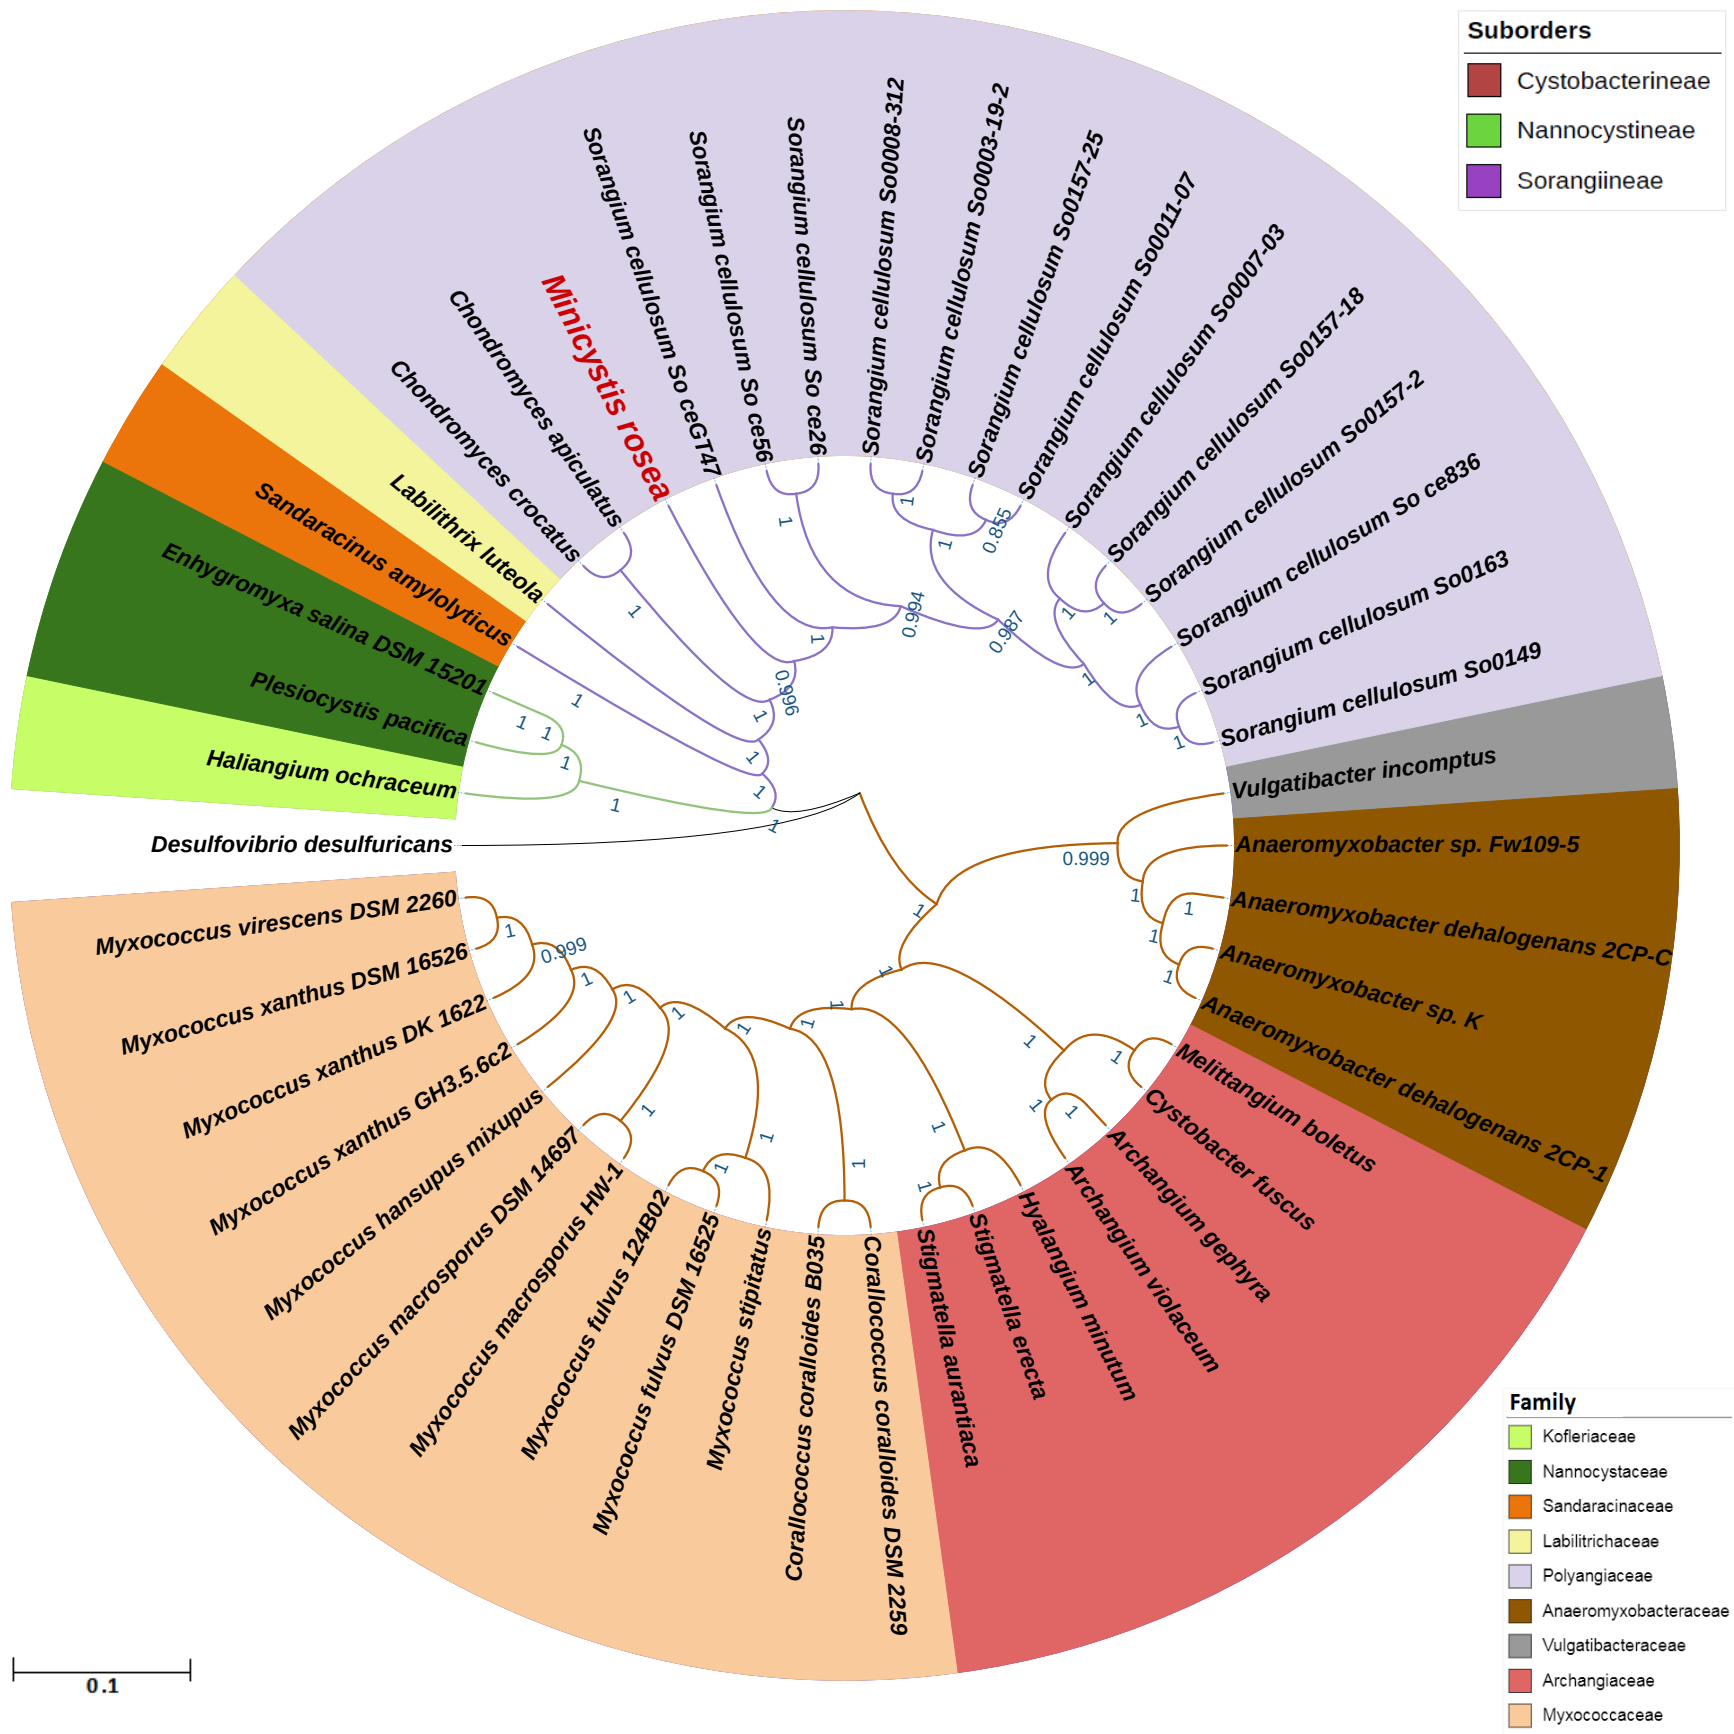

Supplement: 12864_2021_7955_MOESM1_ESM.pdf [file 12864_2021_7955_MOESM1_ESM.pdf]
