# Supplementary material for: Complete genome sequence and identification of polyunsaturated fatty acid biosynthesis genes of the myxobacterium Minicystis rosea DSM 24000T
Source: PubMed Central journal article supplement (PMC8436480; doi:10.1186/s12864-021-07955-x), 2021-09-13
Supplement: 12864_2021_7955_MOESM3_ESM.pdf [file 12864_2021_7955_MOESM3_ESM.pdf]

**Supplementary Table S1:** DDH and ANI values between *M. rosea* and selected myxobacteria. Color intensity changes from green to orange corresponding with higher to lower values, respectively.

| Query                              | Sub order                 | Family                              | Members                                    | Genome size (Mbp)                          | DDH   | ANI value (%) |
|------------------------------------|---------------------------|-------------------------------------|--------------------------------------------|--------------------------------------------|-------|---------------|
| <i>Minicycstis roseae</i> DSM 2400 | Sorangineae               | <i>Labilitrichaceae</i>             | <i>Labilitrix luteola</i> DSM 27648        | 12.19                                      | 19.1  | 70.26         |
|                                    |                           | <i>Polyangiaceae</i>                | <i>Chondromyces apiculatus</i> DSM 436     | 11.49                                      | 19.8  | 72.93         |
|                                    |                           |                                     | <i>Polyangium fumosum</i> DSM 14668        | 12.88                                      | 20.1  | 73.42         |
|                                    |                           |                                     | <i>Polyangium</i> sp. SDU3-1               | 12.28                                      | 19.7  | 73.6          |
|                                    |                           |                                     | <i>Sorangium cellulosum</i> So ce26        | 14.56                                      | 20.7  | 74.34         |
|                                    |                           |                                     | <i>Sorangium cellulosum</i> So ce56        | 13.03                                      | 20.9  | 74.64         |
|                                    |                           |                                     | <i>Sorangium cellulosum</i> So ce836       | 14.59                                      | 21.1  | 74.73         |
|                                    |                           |                                     | <i>Sorangium cellulosum</i> So ceGT47      | 11.26                                      | 20.9  | 75            |
|                                    |                           |                                     | <i>Sorangium cellulosum</i> So0003-19-2    | 10.09                                      | 21.4  | 75            |
|                                    |                           |                                     | <i>Sorangium cellulosum</i> So0007-03      | 12.39                                      | 21.4  | 74.97         |
|                                    |                           |                                     | <i>Sorangium cellulosum</i> So0008-312     | 11.21                                      | 20.8  | 75            |
|                                    |                           |                                     | <i>Sorangium cellulosum</i> So0157-2       | 14.78                                      | 21    | 75            |
|                                    |                           |                                     | <i>Sorangium cellulosum</i> So0163         | 12.46                                      | 21.2  | 74.86         |
|                                    |                           |                                     | <i>Sandaracinaceae</i>                     | <i>Sandaracinus amylolyticus</i> DSM 53668 | 10.33 | 18.3          |
|                                    | Cystobacterineae          | <i>Anaeromyxobacteraceae</i>        | <i>Anaeromyxobacter dehalogenans</i> 2CP-1 | 5.03                                       | 18.8  | 69.52         |
|                                    |                           | <i>Archangiaceae</i>                | <i>Archangium gephyra</i> DSM 2261         | 12.49                                      | 18.4  | 68.51         |
|                                    |                           |                                     | <i>Cystobacter fuscus</i> DSM 52655        | 12.35                                      | 19.1  | 68.72         |
|                                    |                           |                                     | <i>Hyalangium minutum</i> DSM 14724        | 10.12                                      | 18.8  | 66.39         |
|                                    |                           | <i>Myxococcaceae</i>                | <i>Myxococcus hansupus</i> mixupus         | 9.49                                       | 18.5  | 68.19         |
|                                    | <i>Vulgatibacteraceae</i> | <i>Vulgatibacter incomptus</i>      | 4.35                                       | 18.1                                       | 68.56 |               |
| Nannocystineae                     | <i>Nannocystaceae</i>     | <i>Enhygromyxa salina</i> DSM 15201 | 10.26                                      | 17.3                                       | 67.32 |               |

**Supplementary Table S2:** Excel file has been provided.
